# Supplementary material for: COL17A1 editing via homology-directed repair in junctional epidermolysis bullosa
Source: PubMed Central journal article supplement (PMC9454317; doi:10.3389/fmed.2022.976604), 2022-08-25
Supplement: Data_Sheet_1.pdf [file Data_Sheet_1.pdf]

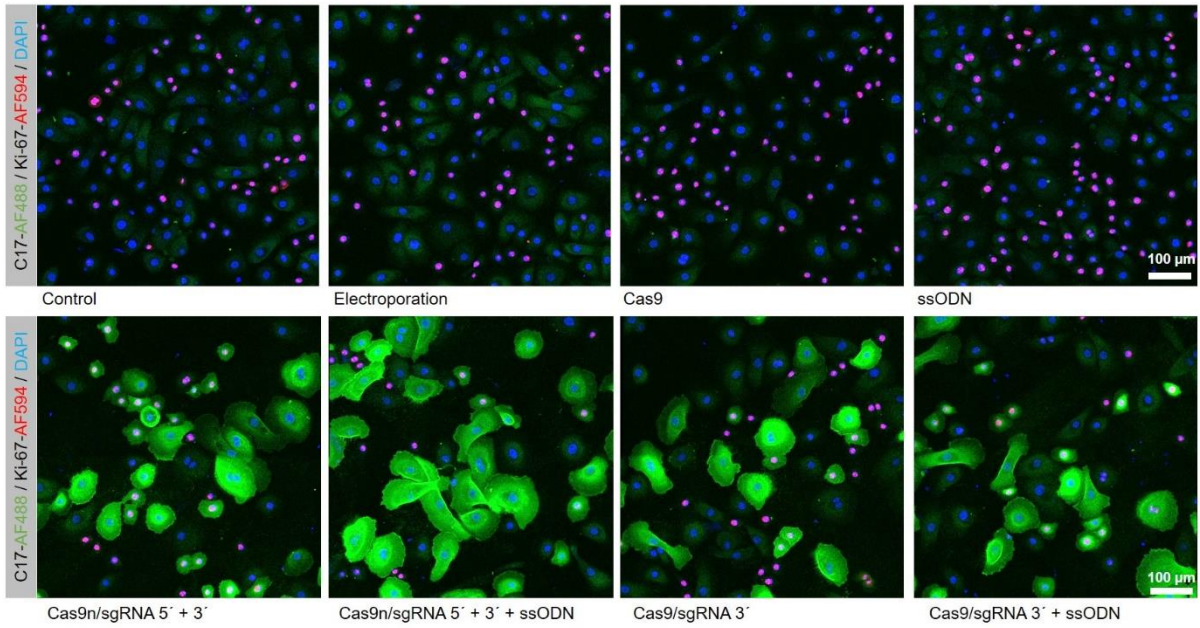

**Figure S1: Immunofluorescence staining prior to colony formation assay.** IF analysis prior to seeding of treated JEB keratinocytes onto feeder layer for colony formation analysis revealed a high C17 restoration efficiency for all gene editing strategies.

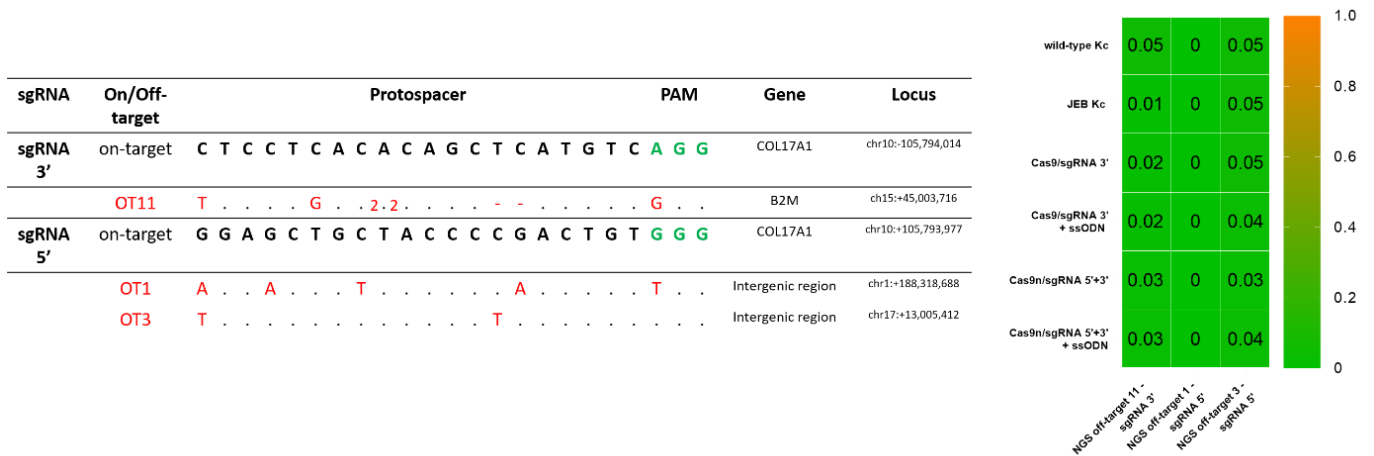

**Figure S2: Analysis of off-target indel formation and ssODN integration.** NGS-based analysis of previously identified off-target sites for sgRNA 3' (OT11) and sgRNA 5' (OT1 and OT3) revealed no signs of indel formation and ssODN integration.

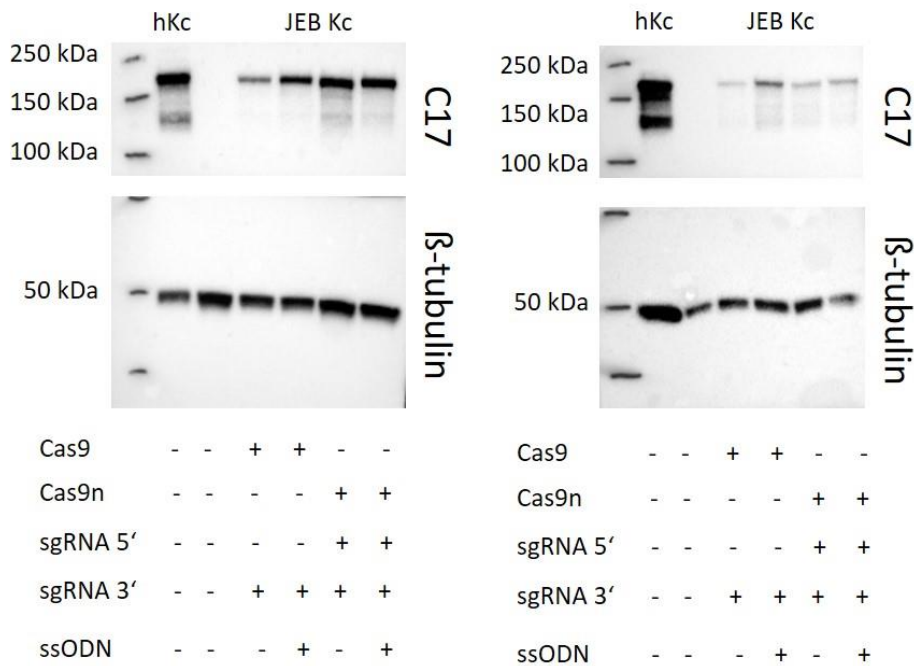

**Figure S3: Western blot analysis of cell culture lysates**

Western blot analysis of cell culture lysates of RNP (w/wo ssODN)-treated primary JEB keratinocytes revealed the presence of full-length C17 at a size of 180 kDa.

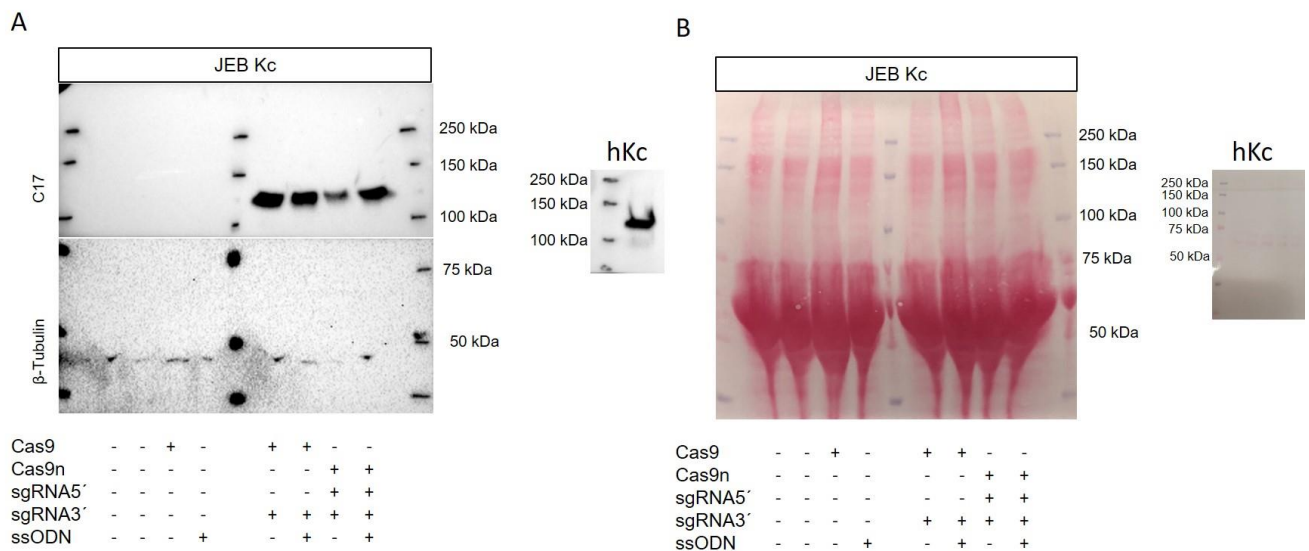

**Figure S4: Western blot analysis of cell culture supernatants.** (A) Western blot analysis of supernatants of RNP (w/wo ssODN)-treated primary JEB keratinocytes and wild-type keratinocytes (hKc) revealed the presence of the C17 ectodomain at a size of 120 kDa. (B) Ponceau red staining of cell culture supernatants.

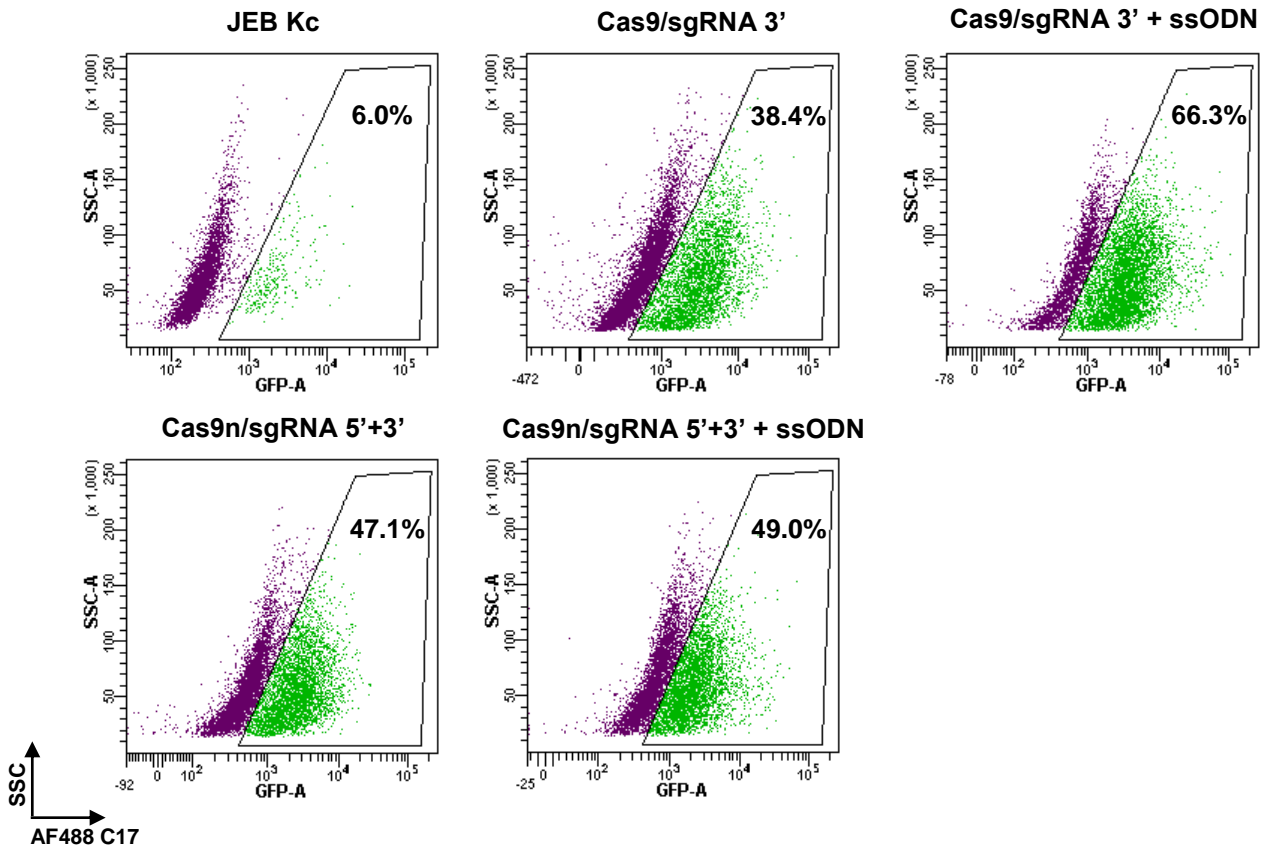

**Figure S5: Gating strategy for flow cytometric analysis of C17-stained JEB keratinocytes.**

|                              | Forward primer (5' – 3')                                                                                          | Reverse primer (5' – 3')                                         |
|------------------------------|-------------------------------------------------------------------------------------------------------------------|------------------------------------------------------------------|
| PCR On-target                | TAAGCCCGGTTTCCTTCCAC                                                                                              | TACGCTGCATGCTCTCTGAC                                             |
| NGS On-target                | TCGTCGGCAGCGTCAGATGTG<br>TATAAGAGACAGCCCACTCAT<br>GCAGCTTCTCACC                                                   | GTCTCGTGGGCTCGGAGATGTG<br>TATAAGAGACAGCGATGTCAGT<br>GCCATAGGGACC |
| NGS off-target 11 – sgRNA 3' | AAAACGGGAAAAGTCCCTCTC                                                                                             | GAGAGACTCACGCTGTCACG                                             |
| NGS off-target 1 – sgRNA 5'  | CATTGCCACGAGTATTGCAT                                                                                              | CCCTGGGAAAAGATGTGACT                                             |
| NGS off-target 3 – sgRNA 5'  | GAGTTACTGCCCTTTCCAT                                                                                               | CCACAAGGTTCTTGGCTTT                                              |
| sqRT-PCR – <i>COL17A1</i>    | GCAATGGCGGACTATTGGGA                                                                                              | AGTCACGTTGCTGTAGGCAG                                             |
| sqRT-PCR – <i>GAPDH</i>      | GCCAACGTGTCAGTGGTGGA                                                                                              | CACCACCCTGTTGCTGTAGCC                                            |
| ssODN                        | C*A*C*GGATGCCTCCCACAGTCGGGGTAGCAGCTCCTCCTCACA<br>CAGTCTATCTGTCAGGCGGGCAGCTCCTACAGCTCTTCCATGAG<br>CACAGGAGGAG*G*T* |                                                                  |

\*Phosphorothioate backbone

**Table S1: Primers used for PCR, NGS on-and off-target PCR and sqRT-PCR.**

| Treatment                 | relative clonal growth area [%] |
|---------------------------|---------------------------------|
| Control                   | 100,0                           |
| Electroporation           | 145,1                           |
| Cas9                      | 126,6                           |
| ssODN                     | 127,3                           |
| Cas9/sgRNA 3'             | 66,2                            |
| Cas9/sgRNA 3' + ssODN     | 52,6                            |
| Cas9n/sgRNA 5'+3'         | 35,8                            |
| Cas9n/sgRNA 5'+3' + ssODN | 37,7                            |

**Table S2: Relative clonal growth area upon CRISPR/Cas9 treatment**
